# Supplementary material
Source: PubMed Central journal article supplement (PMC2732880)
Supplement: 0907131106_0907131106SI.pdf [file 0907131106_0907131106SI.pdf]

# Supporting Information

Krieg et al. 10.1073/pnas.0907131106

## SI Text

**Reagents.** Recombinant human TNF- $\alpha$  was from Peprotech. Monoclonal rat anti-RIP2 was purchased from Alexis, whereas monoclonal mouse anti-XIAP was obtained from BD Biosciences, mouse-monoclonal anti  $\beta$ -actin, mouse-monoclonal anti-GST-antibody and mouse-monoclonal anti-FLAG antibodies from Sigma Aldrich, mouse-monoclonal anti-GFP antibody from Santa Cruz Biotechnology, mouse-monoclonal anti-His-antibody from Qiagen and mouse-monoclonal anti-myc-antibody from Roche Applied Science. Anti-SMAC antiserum generated in rabbits has been described (1).

**Expression Plasmids.** To subclone the complete ORF of XIAP and the BIR2-coding region into pEGFP-C2 (Clontech), the corresponding inserts were excised from previously described pcDNA3 plasmids (2) by digestion with *EcoRI/XhoI*, purified, and ligated into pEGFP-C2 at the *EcoRI/SalI* cloning sites. Various codons in the XIAP and BIR2 cDNAs were mutated using the QuikChange Site-Directed Mutagenesis kit (Stratagene). RIP2 cloned into pCR3.V64-Met-FLAG was a gift of J. Tschopp (University of Lausanne). Plasmids encoding 6 $\times$ -His-FLAG-tagged versions of *NOD1* and *NOD2* human cDNAs were generated by PCR and subcloned into HIV-based self-inactivating lentiviral vector pCSC-SP-PW.

**IL-8 ELISA.** Human IL-8 secreted into cell culture media was measured using an ELISA (eBioscience). Briefly, 10<sup>5</sup> cells per well were seeded into 24 well plates. The next day cells were stimulated with MDP (20  $\mu$ g/mL) or  $\gamma$ Tri-DAP (20  $\mu$ g/mL) for 24 h. Subsequently, the media was removed and centrifuged at 15,000  $\times$  g for 5 min. Cell-free supernatants containing the secreted IL-8 were stored at  $-80^{\circ}\text{C}$  until performance of ELISA assays.

**Real-Time RT-PCR.** Total RNA was extracted from HCT-116 and MEF cell lines by TRIzol<sup>®</sup> solution (Gibco BRL, Life Technologies). After isolation, 1–5  $\mu$ g total RNA were treated with DNase (DNA-free, Ambion) and reverse-transcribed, in the presence of oligo(dT) primer, according to the manufacturer (SuperScript First-Strand Synthesis, Invitrogen). First-strand cDNA was diluted and analyzed in triplicates with gene-specific

primers by real-time PCR, using a Stratagene Mx3000p sequence detection system with SYBR Green PCR master mix (Applied Biosystems). The gene expression (fold induction) was normalized with the respective levels of 18S or cyclophilin (CPH) expression.

**Protein Expression and Purification.** Recombinant GST and His-6-tagged proteins were produced in bacteria and purified, essentially as described (2–5). Briefly, recombinant GST-tagged human full length XIAP, BIR1–3, BIR1+2, BIR2+3, BIR1+3, BIR3+RING, BIR1, BIR2, BIR3, and Survivin were produced from previously described pGEX4T-1 constructs into *E. coli* strain BL21(DE3). Cultures were induced with 50  $\mu$ M IPTG at 22 $^{\circ}\text{C}$  for 3 h and fusion proteins affinity purified by incubating cleared lysates with glutathione-Sepharose at 4 $^{\circ}\text{C}$  for 1 h under mild rotation. Glutathione Sepharose beads were washed three times and GST-fusion proteins eluted with 10 mM reduced glutathione dissolved in 50 mM Tris-HCl (pH 8) and 1 mM DTT. Eluted proteins were concentrated and purified in exchange buffer (50 mM Tris-HCl pH 8 and 1 mM DTT) with Amicon Ultra Centrifugal Filters. Purification of His-Ssel protein has been previously described (4).

Expression plasmid for the active form of SMAC (56–239) containing nine Histidines at the C terminus was kindly supplied by Xiaodong Wang (5). Transformed cells (BL21 DE3) were grown at 37 $^{\circ}\text{C}$  to an OD<sub>600</sub> of 1.0 and induced with 1 mM IPTG and growth was continued at room temperature for 3 h. Cells were harvested by centrifugation at 6,000 rpm for 15 min. Cell pellets were frozen and stored at  $-20^{\circ}\text{C}$ . Pellets were resuspended in 60 mL of 50 mM Tris at pH 8.0/1 mM DTT/1 mM PMSF/100  $\mu$ g/mL lysozyme. Cells were sonicated for 10 min and then centrifuged at 20,000 rpm for 30 min. The resulting supernatant was then added to 9 mL preequilibrated (50 mM Tris at pH 8.0/1 mM DTT) Ni-NTA resin (Qiagen) and rotated slowly for 1 h at 4 $^{\circ}\text{C}$ . The slurry was poured into a column and the settled resin was washed over-night with 400 mL of 50 mM Tris at pH 8.0/1 mM DTT. SMAC protein was then eluted with a 200 mL linear gradient of 100 mL of 50 mM Tris at pH 8.0/1 mM DTT to 100 mL of 50 mM Tris at pH 8.0/1 mM DTT/250 mM imidazole. Fractions were scanned at OD<sub>280</sub> to locate eluted protein, pooled, and frozen on dry ice/ethanol and stored at  $-80^{\circ}\text{C}$ .

1. Krajewska M, et al. (2005) Tumor-associated alterations in caspase-14 expression in epithelial malignancies. *Clin Cancer Res* 11:5462–5471.
2. Takahashi R, et al. (1998) A single BIR domain of XIAP sufficient for inhibiting caspases. *J Biol Chem* 273:7787–7790.
3. Marusawa H, et al. (2003) HBXIP functions as a cofactor of survivin in apoptosis suppression. *EMBO J* 22:2729–2740.

4. Le Negrate G, et al. (2008) *Salmonella* secreted factor L deubiquitinase of *Salmonella typhimurium* inhibits NF- $\kappa$ B, suppresses I $\kappa$ B $\alpha$  ubiquitination and modulates innate immune responses. *J Immunol* 180:5045–5056.
5. Du C, Fang M, Li Y, Li L, Wang X (2000) Smac, a mitochondrial protein that promotes cytochrome c-dependent caspase activation by eliminating IAP inhibition. *Cell* 102:33–42.

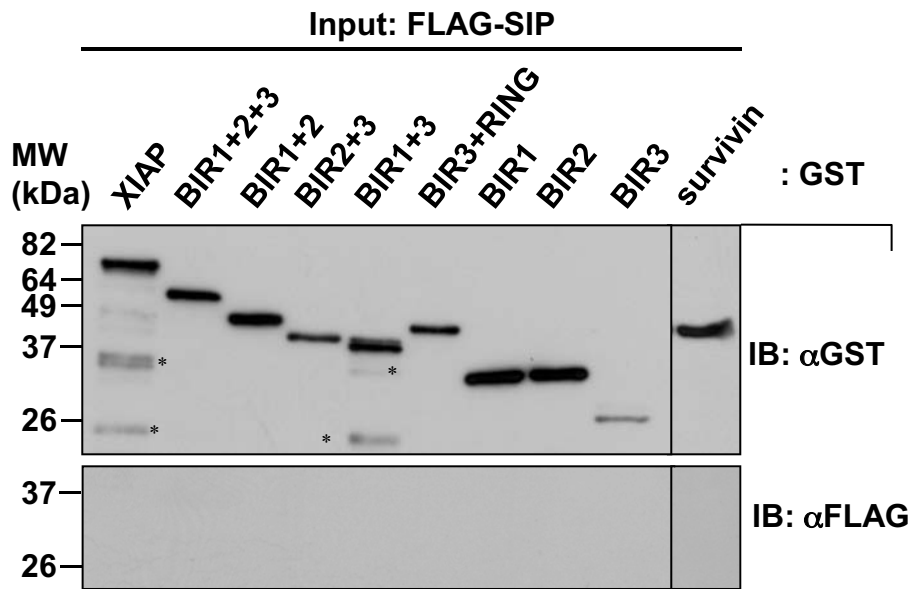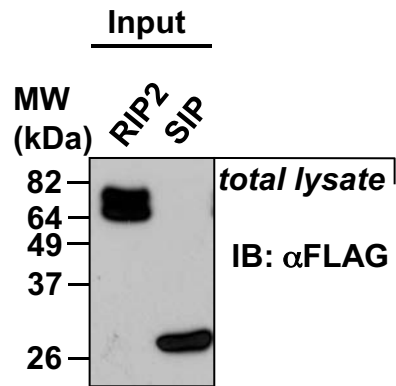

**Fig. S1.** XIAP does not bind to SIP. As a control for specificity of XIAP binding to RIP2, lysates of transfected HEK293T cells expressing FLAG-SIP were incubated overnight with recombinant GST-XIAP, GST-XIAP mutants, or GST-Survivin immobilized on glutathione-Sepharose. Beads were washed, boiled in Laemmli sample buffer, centrifuged and the supernatants were analyzed by SDS/PAGE/immunoblotting using mouse monoclonal anti-GST and peroxidase linked anti-FLAG antibodies. Asterisks denote nonspecific bands.

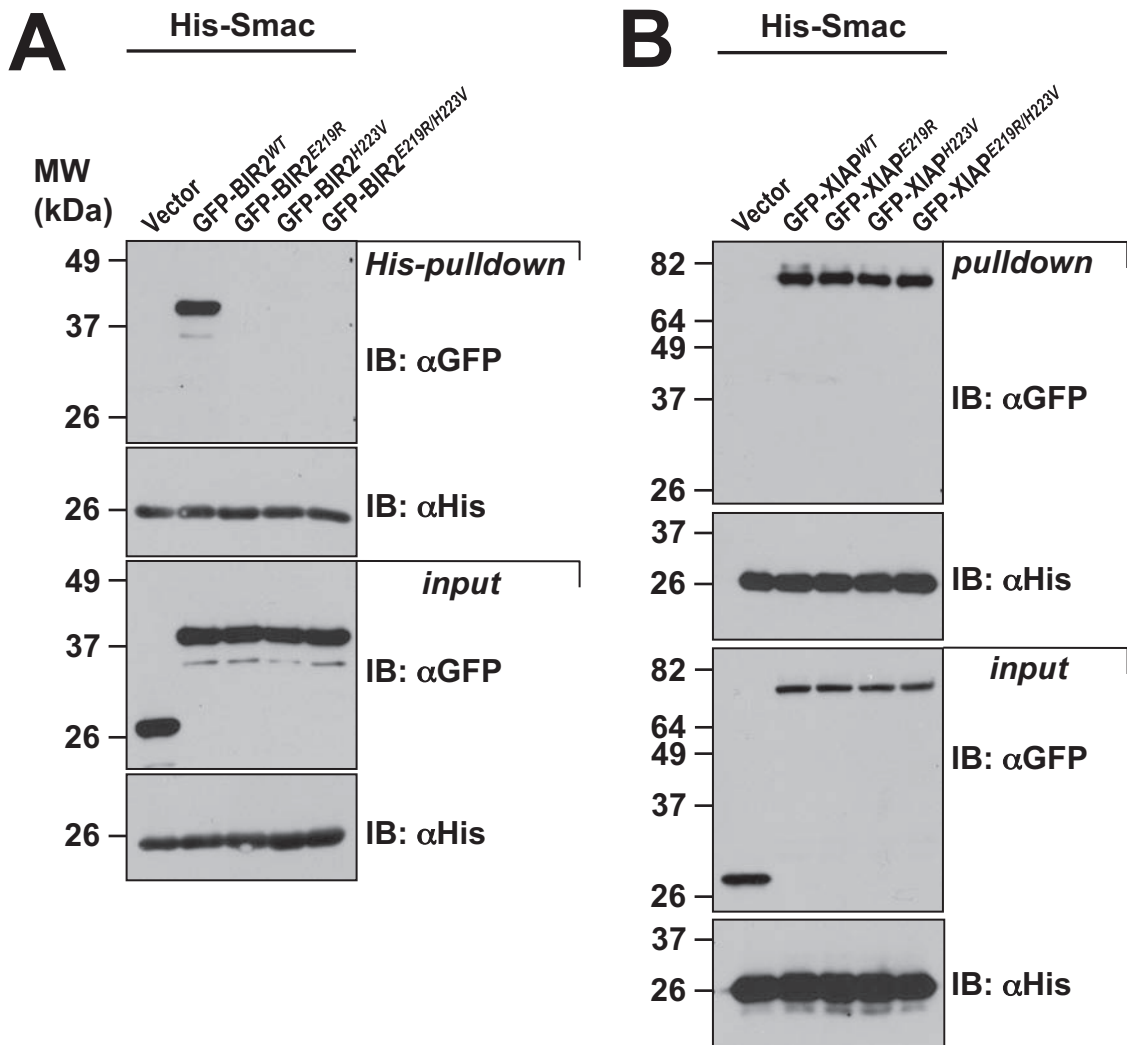

**Fig. S2.** Analysis of SMAC protein binding to XIAP mutants. (A) Lysates of transfected HEK293T cells expressing (A) GFP-BIR2<sup>WT</sup>, GFP-BIR2<sup>E219R</sup>, GFP-BIR2<sup>H223V</sup>, GFP-BIR2<sup>E219R/H223V</sup> or (B) full-length GFP-XIAP<sup>WT</sup>, GFP-XIAP<sup>E219R</sup>, GFP-XIAP<sup>H223V</sup>, GFP-XIAP<sup>E219R/H223V</sup> or empty GFP-plasmid were incubated with His-6-SMAC protein. Lysates were then incubated with Ni-NTA-Agarose with gentle rotation overnight at 4°C. Beads were washed, boiled in Laemmli sample buffer, centrifuged, and the supernatants were subjected to immunoblotting anti-GFP and anti-His-6-tag antibodies.

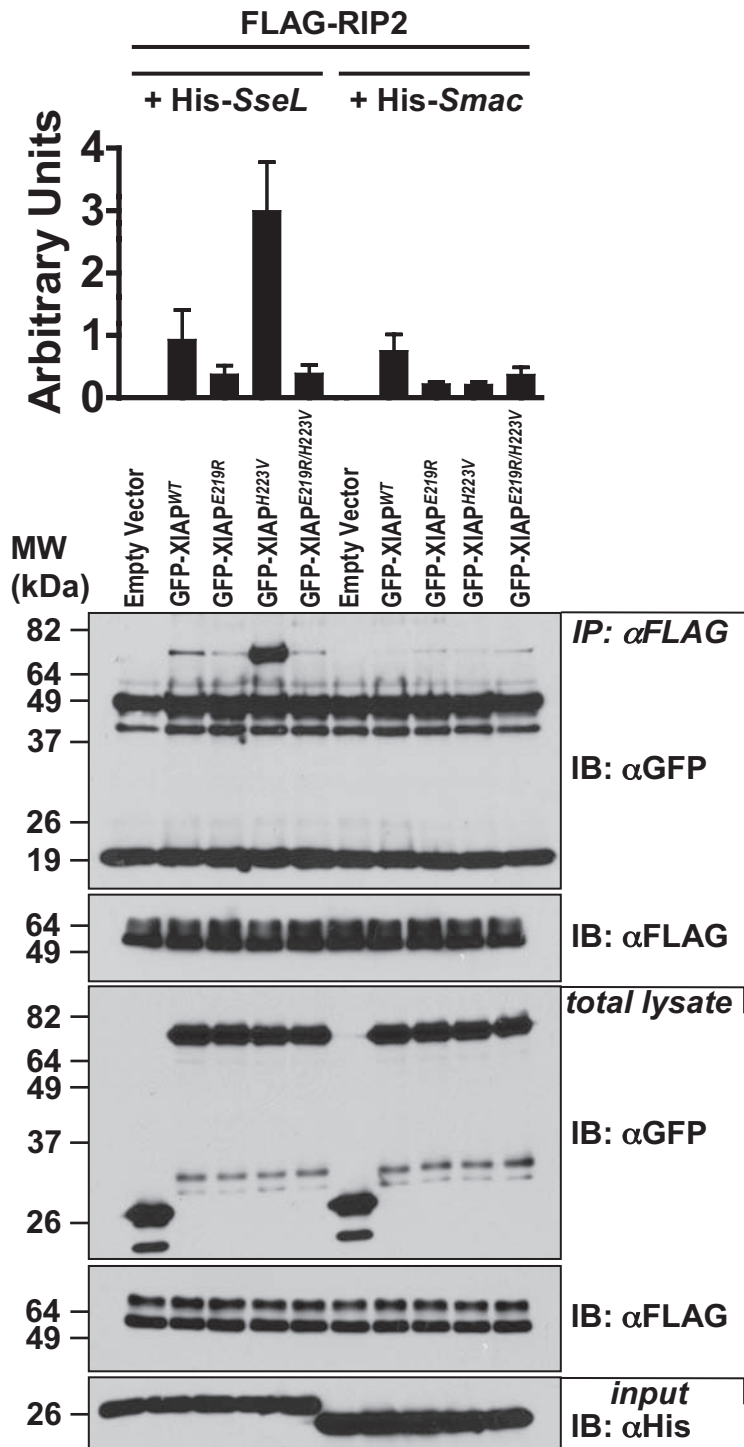

**Fig. S3.** SMAC protein blocks binding of XIAP to RIP2. HEK293T cells were transfected with plasmids encoding FLAG-RIP2 and GFP-XIAP, GFP-XIAP mutants or GFP. After 24 h, lysates were prepared (1 mg) and 2  $\mu$ g recombinant His-6-SMAC or His-6-Ssel was added along with anti-FLAG-antibody. Washed anti-FLAG immunoprecipitates were analyzed by immunoblotting and results were quantified as above (mean  $\pm$  SD;  $n = 3$ ).

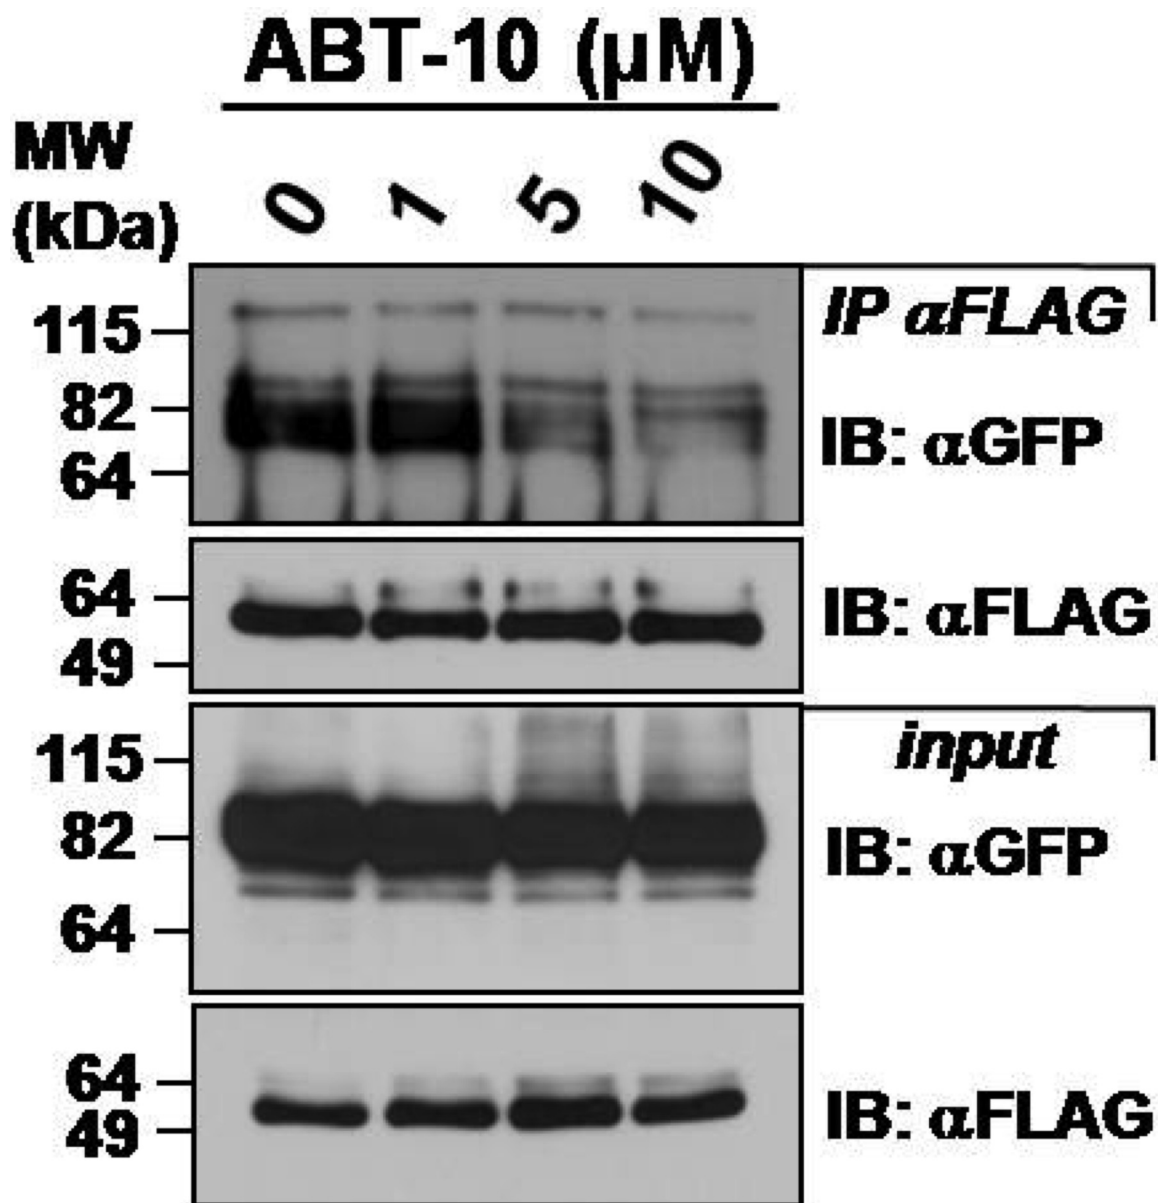

**Fig. S4.** SMAC-mimic compound inhibits RIP2/XIAP interaction in cells. HEK293T cells were co-transfected with plasmids encoding FLAG-XIAP and GFP-RIP2. SMAC-mimicking compound ABT-10 was added to cultures after 6 h. Lysates were prepared after 24 h and subjected to immunoprecipitation using monoclonal anti-FLAG antibody. Immunoprecipitates and lysates (50  $\mu\text{g}$ ) ("input") were analyzed by immunoblotting as above, with indicated antibodies.

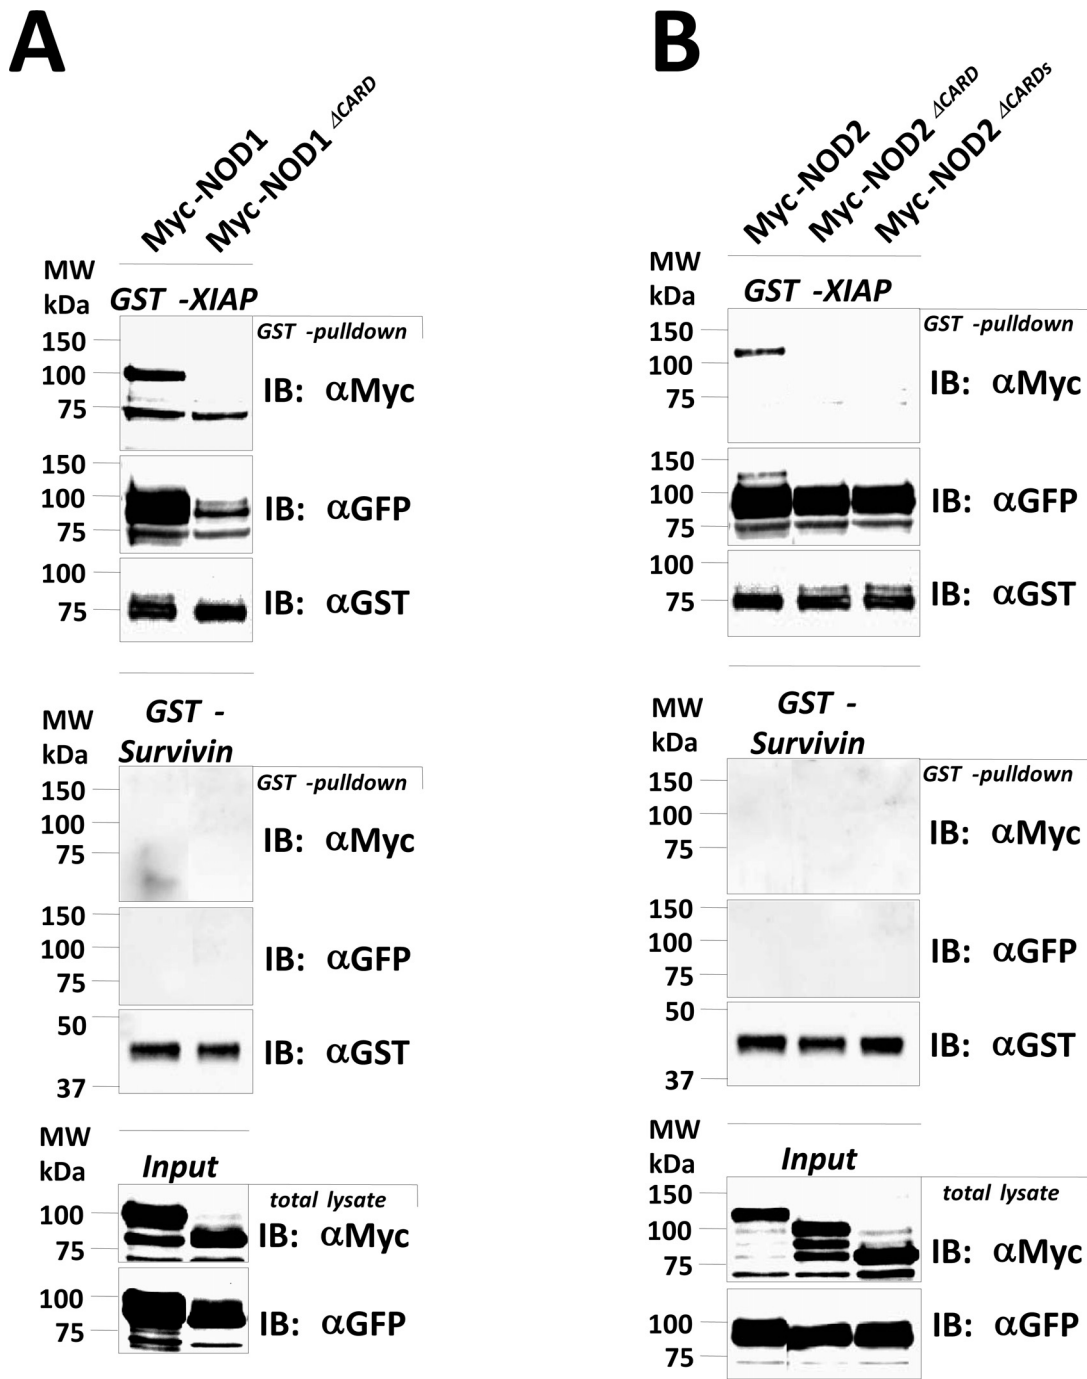

**Fig. S5.** CARD domains are required for association of XIAP with NOD1 and NOD2. HEK293T cells were transfected with plasmids encoding GFP-RIP2 along with (A) Myc-tagged NOD1 or NOD1 $\Delta$ CARD or with (B) NOD2, NOD2 $\Delta$ CARD, or NOD2 $\Delta$ CARDs. Cell lysates were prepared after 24 h (1 mg) and GST pull-down assays were performed using either GST-XIAP (Top) or GST-Survivin (Bottom). Glutathione-Sepharose beads were analyzed by SDS/PAGE/immunoblotting as above. An aliquot of lysates (input) was analyzed directly by immunoblotting.
